# Supplementary material for: Synthesis and structural characterization of an azatitanacyclobutene: the key intermediate in the catalytic anti-Markovnikov addition of primary amines to α-alkynes
Source: Royal Society of Chemistry journal article supplement (doi:10.1039/b316383k), 2004-01-01
Supplement: b316383k.doc [file b316383k.doc]

**EXPERIMENTAL PROCEDURES**

**General Methods and Instrumentation**

All manipulations were carried out using standard Schlenk line or dry-box techniques under an atmosphere of argon or dinitrogen. Solvents were pre-dried over activated 4 Å molecular sieves and were refluxed over sodium (toluene), sodium / benzophenone (tetrahydrofuran, diethyl ether), sodium/potassium alloy (pentane) or calcium hydride (dichloromethane) under a dinitrogen atmosphere and collected by distillation. C6D6 was dried over potassium, distilled under reduced pressure and stored under nitrogen in a Teflon valve ampoule. NMR samples were prepared under dinitrogen in 5 mm Wilmad 507-PP tubes.

1H and 13C{1H}NMR spectra were recorded on Bruker Avance 300, 400, 500 and Varian Unity-Plus 400 spectrometers. 1H and 13C assignments were confirmed when necessary with the use of DEPT-135, DEPT-90, and two dimensional 1H-1H and 13C-1H NMR experiments. 1H and 13C spectra were referenced internally to residual protio-solvent (1H) or solvent (13C) resonances, and are reported relative to tetramethylsilane ( = 0 ppm). Chemical shifts are quoted in  (ppm) and coupling constants in Hertz (Hz). Infrared spectra were prepared as KBr pellets and were recorded on a Perkin-Elmer 1600 series FTIR spectrometer. Infrared data are quoted in wavenumbers (cm-1).

The compounds [Ti(NtBu)(N2Npy)(py)] and [Ti(N-2,6-C6H3iPr2)(N2Npy)(py)] were prepared according to published procedures [*Inorg. Chem.*, 2001, **40**, 870]. All other compounds and reagents were purchased from commercial chemical suppliers and used without further purification.

**General procedure for the preparation of [Ti(N2Npy){κ2-N(tBu)CH=CPh}] (3) and [Ti(N2Npy){κ2-N(tBu)CH=C-4-C6H4Me}] (4)**

To a solution of [Ti(NtBu)(N2Npy)(py)] (200 mg, 0.396 mmol) in toluene (20 ml) was added and equimolar amount of arylacetylene *via* syringe. The resulting brown solution was stirred for 60 min. Removing the volatiles under reduced pressure produced brown waxy solids. Yields = 63% (**3**), 62% (**4**).

**3:** 1H NMR data (500.1 MHz, C6D6, 293 K): 9.43 (1 H, s, C=CH), 9.22 (1 H, ddd, H6, 3*J*(H5H6) = 5.3 Hz, 4*J*(H4H6) = 1.7 Hz, 5*J*(H3H6) = 0.6 Hz), 7.37 (2 H, t, *m-*Ph, 3*J* = 8.2 Hz), 7.31 (2 H, dd, *o-*Ph, 3*J* = 8.3 Hz), 7.09 (1 H, tt, *p-*Ph, 3*J* = 7.2 Hz, 4*J* = 1.4 Hz), 6.97 (1 H, app. td, H4, app. 3*J*(H3H4H5) = 7.7 Hz, 4*J*(H4H6) = 1.7 Hz), 6.88 (1 H, d, H3, 3*J*(H3H4) = 6.6 Hz), 6.38 (1 H, ddd, H5, 3*J*(H4H5) = 7.5 Hz, 3*J*(H5H6) = 5.3 Hz, 4*J*(H3H5) = 1.3 Hz), 3.99 (2 H, d, CHH, 2*J* = 12.4 Hz), 3.18 (2 H, d, CHH, 2*J* = 12.4 Hz), 1.54 (9 H, s, CMe3), 1.11 (3 H, s, Me of N2Npy), 0.00 (18 H, s, SiMe3) ppm. 13C{1H} NMR data (75.5 MHz, C6D6, 293 K): 188.0 (C=CH), 160.6 (C2), 150.7 (C=CH), 147.5 (C6), 138.0 (C4), 128.8 (*m-*Ph), 128.7 (*o-*Ph), 126.0 (*ipso-*Ph), 122.6 (*p-*Ph), 121.3 (C5), 120.4 (C3), 64.1 (CH2NSiMe3), 57.4 (CMe3), 49.7 (C(CH2NSiMe3)2), 31.0 (CMe3), 22.7 (Me of N2Npy), 0.3 (SiMe3) ppm.

**4:** 1H NMR data (C6D6, 300.1 MHz, 293 K): 9.42 (1 H, s, C=CH), 9.24 (1 H, ddd, H6, 3*J*(H5H6) = 5.3 Hz, 4*J*(H4H6) = 1.7 Hz, 5*J*(H3H6) = 0.7 Hz), 7.21 (4 H, overlapping m, *o-*4-C6H4Me and *m-*4-C6H4Me), 6.97 (2 H, overlapping m, H3 and H4), 6.41 1 H, ddd, H5, 3*J*(H4H5) = 7.4 Hz, 3*J*(H5H6) = 5.3 Hz, 4*J*(H3H5) = 1.3 Hz), 3.98 2 H, d, CHH, 2*J* = 12.3 Hz), 3.18 (2 H, d, CHH, 2*J* = 12.3 Hz), 2.30 (3 H, s, 4-C6H4Me), 1.53 (9 H, s, CMe3), 1.11 (3 H, s, Me of N2Npy), 0.00 18 H, s, SiMe3) ppm. 13C{1H} NMR data (C6D6, 75.5 MHz, 293 K): 188.6 (C=CH), 160.7 (C2), 150.2 (C=CH), 147.5 (C6), 137.7 (C4), 131.4 (*p-*4-C6H4Me), 129.4 (*m-*4-C6H4Me), 126.0 (*ipso-*4-C6H4Me), 125.8 (*o-*4-C6H4Me), 121.3 (C3), 120.4 (C5), 64.1 (CH2NSiMe3), 57.4 (CMe3), 49.7 (C(CH2NSiMe3)2), 30.7 (CMe3), 22.1 (Me of N2Npy), 21.1 (4-C6H4Me), 0.3 (SiMe3) ppm.

**General procedure for the preparation of [Ti(N2Npy){κ2-N(2,6-C6H3iPr2)CH=CPh}] (5) and [Ti(N2Npy){κ2-N(2,6-C6H3iPr2)CH=C-4-C6H4Me }] (6)**

To a solution of [Ti(N-2,6-C6H3iPr2)(N2Npy)(py)] (197 mg, 0.323 mmol) in toluene (20 ml) was added and equimolar amount of arylacetylene *via* syringe. The resulting brown solution was stirred for 60 min. before removing the volatiles under reduced pressure affording a brown solid. This was dissolved in pentane (10 ml) and cooled to –20 °C to afford metallacyclic complexes **5** and **6** as dark brown crystalline solids. Yields **5**: 61 mg (30%); **6**: 37 mg (16%).

**5**: 1H NMR data (500.1 MHz, C6D6, 293 K): 9.87 (1 H, s, C=CH), 8.37 (1 H, ddd, H6, 3*J*(H5H6) = 5.4 Hz, 4*J*(H4H6) = 1.7 Hz, 5*J*(H3H6) = 0.9 Hz), 7.50 (2 H, dd, *o-*Ph, 3*J* = 8.3 Hz, 4*J* = 1.3 Hz), 7.39 (2 H, m, *m-*Ph), 7.29 (3 H, overlapping m, *m-*Ph and *p-*Ph), 6.97 (1 H, tt, *p-*Ph, 3*J* = 7.3 Hz, 4*J* = 1.3 Hz), 6.85 (1 H, app. td, H4, app. 3*J*(H3H4H5) = 7.5 Hz, 4*J*(H4H6) = 1.7 Hz), 6.75 (1 H, d, H3, 3*J*(H3H4) = 7.9 Hz), 6.21 (1 H, ddd, H5, 3*J*(H4H5) = 7.4 Hz, 3*J*(H5H6) = 5.4 Hz, 4*J*(H3H5) = 1.1 Hz), 4.13 (2 H, d, CHH, 2*J* = 12.6 Hz), 3.81 (2 H, sept, CHMe2, 3*J* = 6.9 Hz), 3.28 (2 H, d, CHH, 2*J* = 12.6 Hz, 1.35 (6 H, d, CHMeMe, 3*J* = 6.9 Hz), 1.14 (3 H, s, Me of N2Npy), 1.05 (6 H, d, CHMeMe, 3*J* = 6.9 Hz), 0.12 (18 H, s, SiMe3) ppm. 13C{1H} NMR data (75.5 MHz, C6D6, 293 K): 209.1 (C=CH), 165.2 (C=CH), 162.1 (C2), 150.4 (*ipso-*2,6-C6H3iPr2), 146.0 (C6), 145.6 (*ipso-*Ph), 144.9 (*o-*2,6-C6H3iPr2), 138.9 (C4), 132.4 (*m-*Ph), 124.8 (*m-*2,6-C6H3iPr2), 124.3 (*o-*Ph), 124.2 (*p-*2,6-C6H3iPr2), 122.7 (*p-*Ph), 121.6 (C5), 119.8 (C3), 63.5 (CH2NSiMe3), 51.6 (C(CH2NSiMe3)2), 28.0 (CHMe2), 25.5 (CHMe2), 24.0 (CHMe2), 23.7 (Me of N2Npy), 0.8 (SiMe3) ppm.

**6**: 1H NMR data (C6D6, 500.1 MHz, 300 K): 9.89 (1 H, s, C=CH), 8.39 (1 H, ddd, H6, 3*J*(H5H6) = 5.4 Hz, 4*J*(H4H6) = 1.7 Hz, 5*J*(H3H6) = 0.7 Hz), 7.44 (2 H, d, *o-*4-C6H4Me, 3*J* = 8.0 Hz), 7.31 – 7.25 (3 H, overlapping m, *m-*2,6-C6H3iPr2 and *p-*2,6-C6H3iPr2), 7.20 (2 H, d, *m-*4-C6H4Me, 3*J* = 8.0 Hz), 6.85 (1 H, td, H4, 3*J*(H3H4H5) = 7.9 Hz, 4*J*(H4H6) = 1.7 Hz), 6.76 (1 H, d, H3, 3*J*(H3H4) = 8.0 Hz), 6.21 (1 H, ddd, H5, 3*J*(H4H5) = 7.5 Hz, 3*J*(H5H6) = 5.4 Hz, 4*J*(H3H5) = 1.3 Hz), 4.14 (2 H, d, CHH, 2*J* = 12.6 Hz), 3.83 (2 H, sept, CHMe2, 3*J* = 6.9 Hz), 3.30 (2 H, d, CHH, 2*J* = 12.6 Hz), 2.23 (3 H, s, 4-C6H4Me), 1.36 (6 H, d, CHMeMe, 3*J* = 6.9 Hz), 1.15 (3 H, s, Me of N2Npy), 1.06 (6 H, d, CHMeMe, 3*J* = 6.9 Hz), 0.14 (18 H, s, SiMe3) ppm. 13C{1H} NMR data (C6D6, 75.5 MHz, 293 K): 210.2 (C=CH), 164.9 (C=CH), 162.2 (C2), 150.8 (*ipso-*2,6-C6H3iPr2), 147.9 (C6), 144.9 (*o-*2,6-C6H3iPr2), 143.4 (*ipso-*4-C6H4Me), 138.8 (C4), 131.7 (*p-*4-C6H4Me), 129.5 (*m-*4-C6H4Me), 124.6 (*m-*2,6-C6H3iPr2), 124.4 (*o-*4-C6H4Me), 124.2 (*p-*2,6-C6H3iPr2), 121.5 (C5), 119.8 (C3), 63.5 (CH2NSiMe3), 51.6 (C(CH2NSiMe3)), 28.1 (CHMe2), 25.3 (CHMe2), 24.0 (Me of N2Npy), 21.0 (4-C6H4Me), 0.2 (SiMe3) ppm. IR data (KBr pellet): 2980 (s), 1654 (m, νC=C), 1589 (m), 1512 (w), 1472 (m), 1431 (m), 1339 (w), 1246 (s), 1043 (m), 922 (s), 837 (s), 748 (m) cm-1.

**Spectroscopic Data of the Hydroamination Product C6H5CH=CH(NHtBu) (7):** 1H NMR data (C6D6, 399.9 MHz, 293 K): 7.21 (2 H, app. t, *m-*C6H5, app. 3*J* = 8.3 Hz), 7.13 (1 H, t, *p-*C6H5, 3*J* = 7.8 Hz), 7.00 (2 H, d, *o-*C6H5, 3*J* = 8.7 Hz), 6.75 (1 H, dd, CHNHtBu, 3*J*CH-CH = 13.7 Hz, 3*J*CH-NH = 12.8 Hz), 5.43 (1 H, d, C6H5CH, 3*J* = 13.7 Hz), 3.15 (1 H, br. s, NH), 0.92 (9 H, s, tBu) ppm. 13C{1H} NMR data (C6D6, 100.6 MHz, 293 K): 135.3 (*o-*C6H5), 132.6 (CNtBu), 127.9 (*p-*C6H5), 124.4 (*m-*C6H5), 124.2 (*ipso-*C6H5), 102.4 (C6H5C), 50.5 (CMe3), 29.9 (CMe3) ppm.
